# Supplementary material for: Penta(organo)[60]fullerenes as acceptors for organic photovoltaic cells
Source: Royal Society of Chemistry journal article supplement (doi:10.1039/b904485j), 2009-01-01
Supplement: b904485j.pdf [file b904485j.pdf]

*Supplementary Information*

**Penta(organo)[60]fullerenes as Acceptors for Organic Photovoltaic Cells**

Takaaki Niinomi,<sup>a</sup> Yutaka Matsuo,<sup>\*,a,b</sup> Masahiko Hashiguchi,<sup>a</sup> Yoshiharu Sato,<sup>\*,a</sup>  
and Eiichi Nakamura<sup>\*,a,b</sup>

<sup>a</sup> Nakamura Functional Carbon Cluster Project, ERATO, Japan Science and Technology Agency, Hongo, Bunkyo-ku, Tokyo 113-0033, Japan. Fax: +81-3-5800-6889; Tel: +81-3-5800-6889; E-mail: matsuo@chem.s.u-tokyo.ac.jp; ysato@chem.s.u-tokyo.ac.jp

<sup>b</sup> Department of Chemistry, The University of Tokyo, Hongo, Bunkyo-ku, Tokyo 113-0033, Japan. Fax: +81-3-5800-6889; Tel: +81-3-5800-6889; E-mail: nakamura@chem.s.u-tokyo.ac.jp

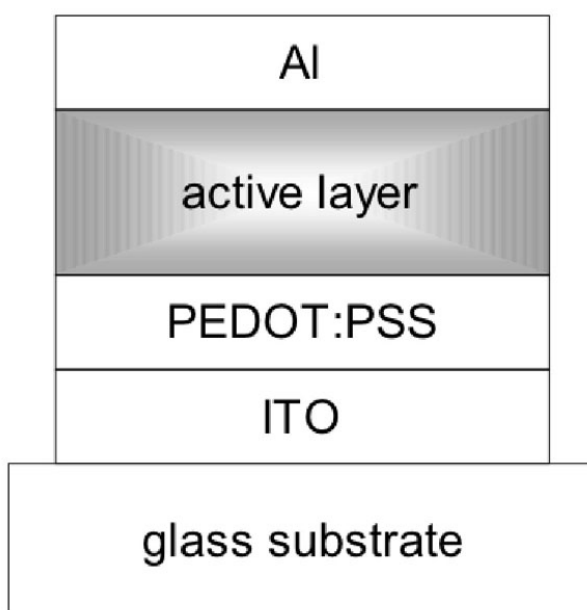

**Figure S1.** Device structure of BHJ photovoltaic cells.

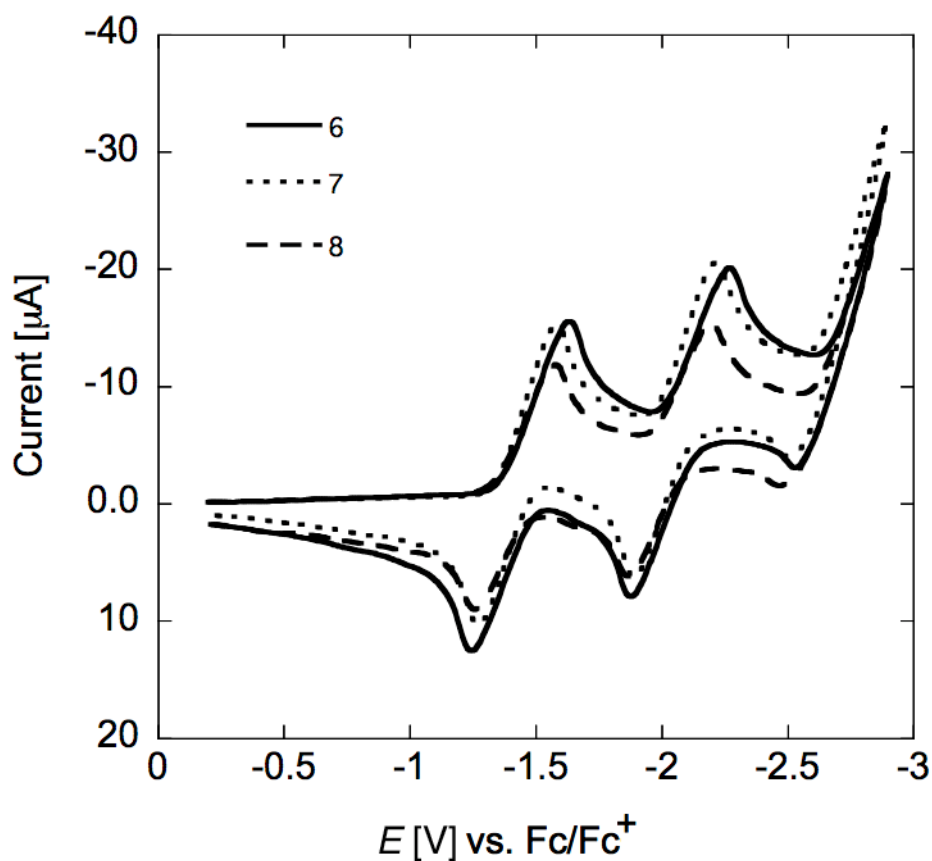

**Figure S2.** Cyclic voltammograms of fullerenes **6–8** in THF containing  $n\text{Bu}_4\text{NClO}_4$  as supporting electrolyte. Working, counter, and reference electrodes are glassy-carbon, platinum coil, and  $\text{Ag}/\text{Ag}^+$  electrodes. Scan rate: 100 mV/s. Compound **6**:  $E_{\text{pc}} = -1.64$  and  $-2.26$  V;  $E_{\text{pa}} = -1.24$  and  $-1.88$  V vs.  $\text{Fc}/\text{Fc}^+$ . Compound **7**:  $E_{\text{pc}} = -1.58$  and  $-2.21$  V;  $E_{\text{pa}} = -1.26$  and  $-1.89$  V vs.  $\text{Fc}/\text{Fc}^+$ . Compound **8**:  $E_{\text{pc}} = -1.57$  and  $-2.19$  V;  $E_{\text{pa}} = -1.25$  and  $-1.87$  V vs.  $\text{Fc}/\text{Fc}^+$ .  $E_{\text{pc}}$  and  $E_{\text{pa}}$  are the cathodic and anodic peak potentials, respectively.

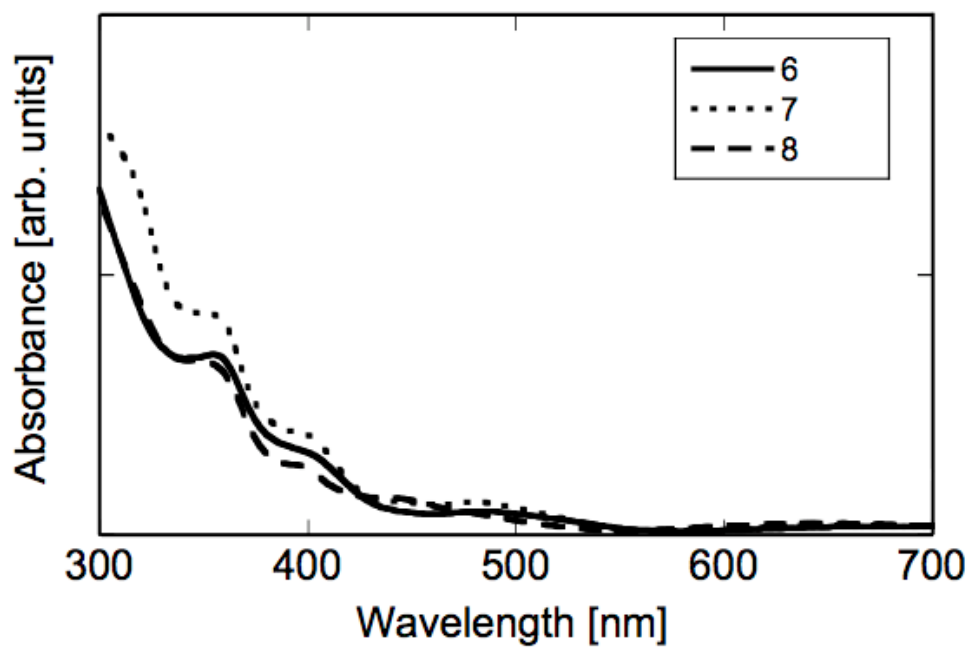

**Figure S3.** Absorption spectra of the films of fullerenes **6–8**, which have three peaks around at 380, 400, and 500 nm. Each film was prepared by spin-coating of the chlorobenzene solution on the ITO/PEDOT:PSS substrates. Data were recorded by means of the reference (ITO/PEDOT:PSS).

(a)

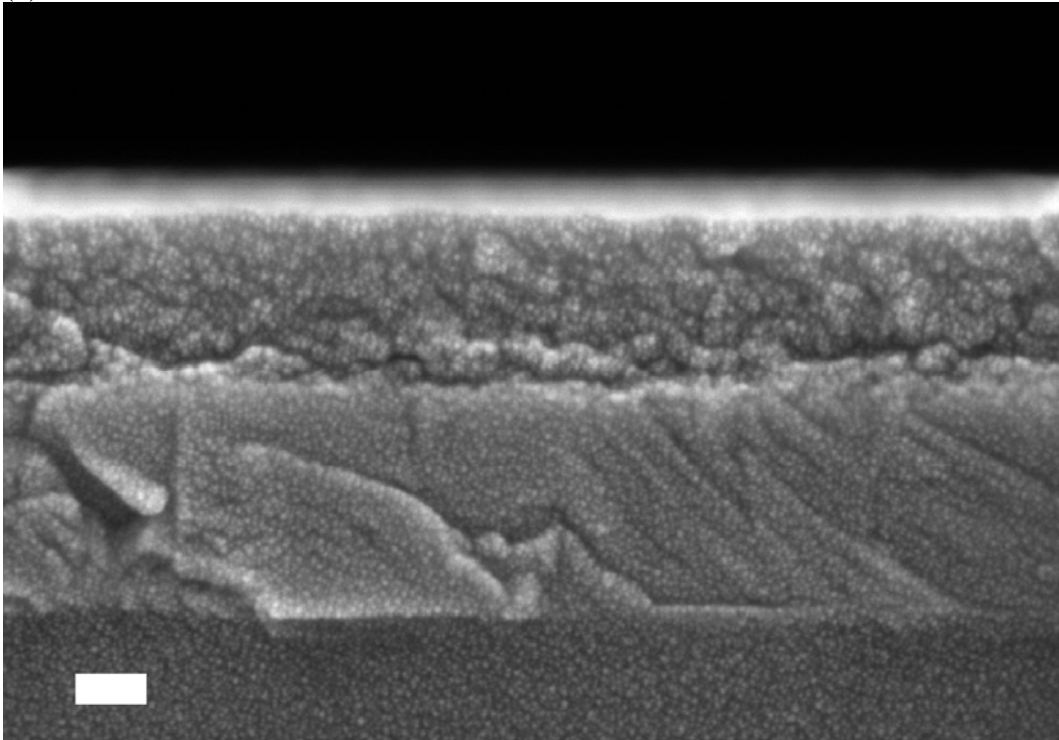

(b)

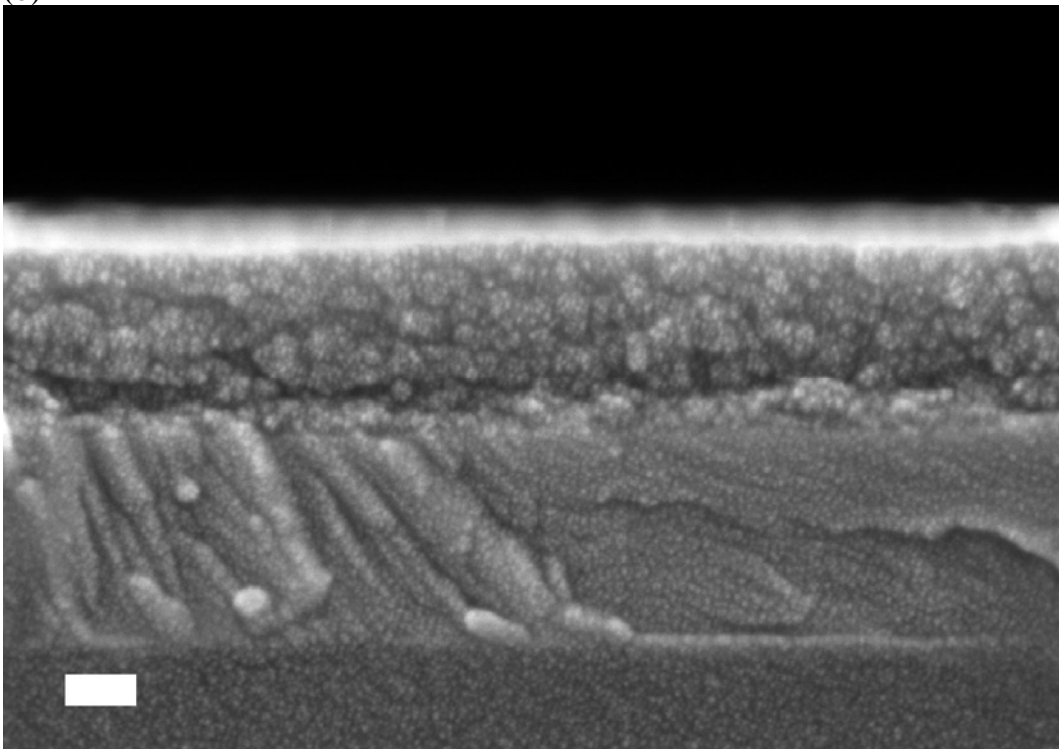

(c)

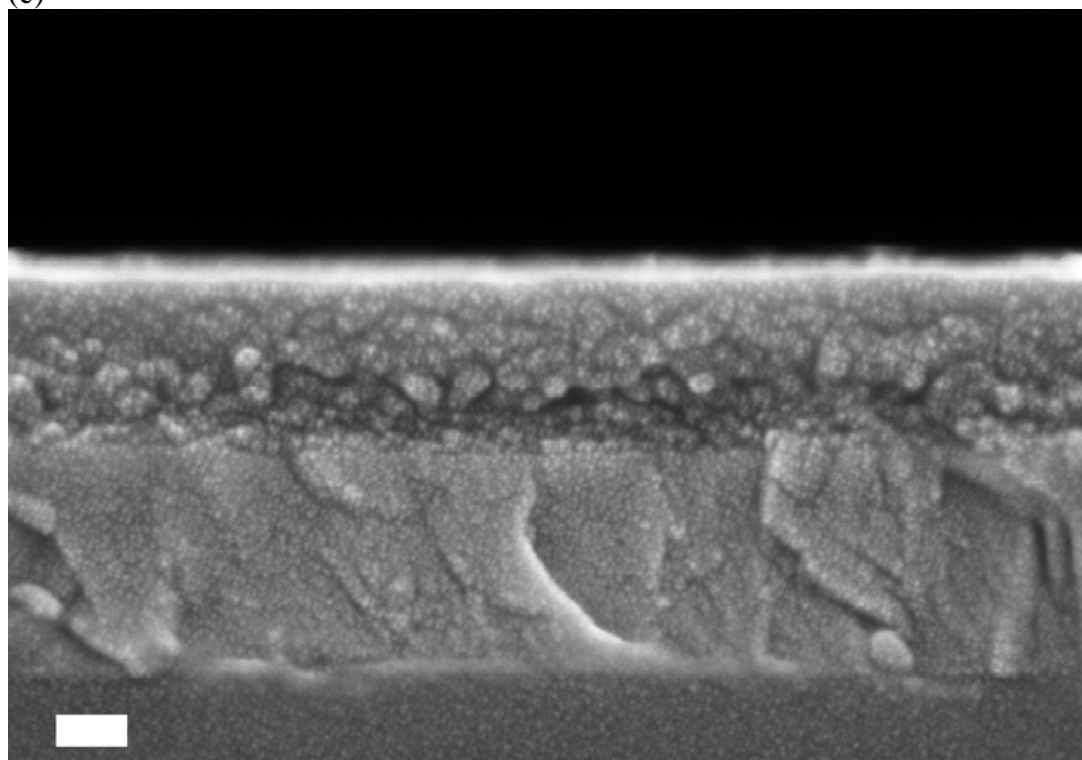

(d)

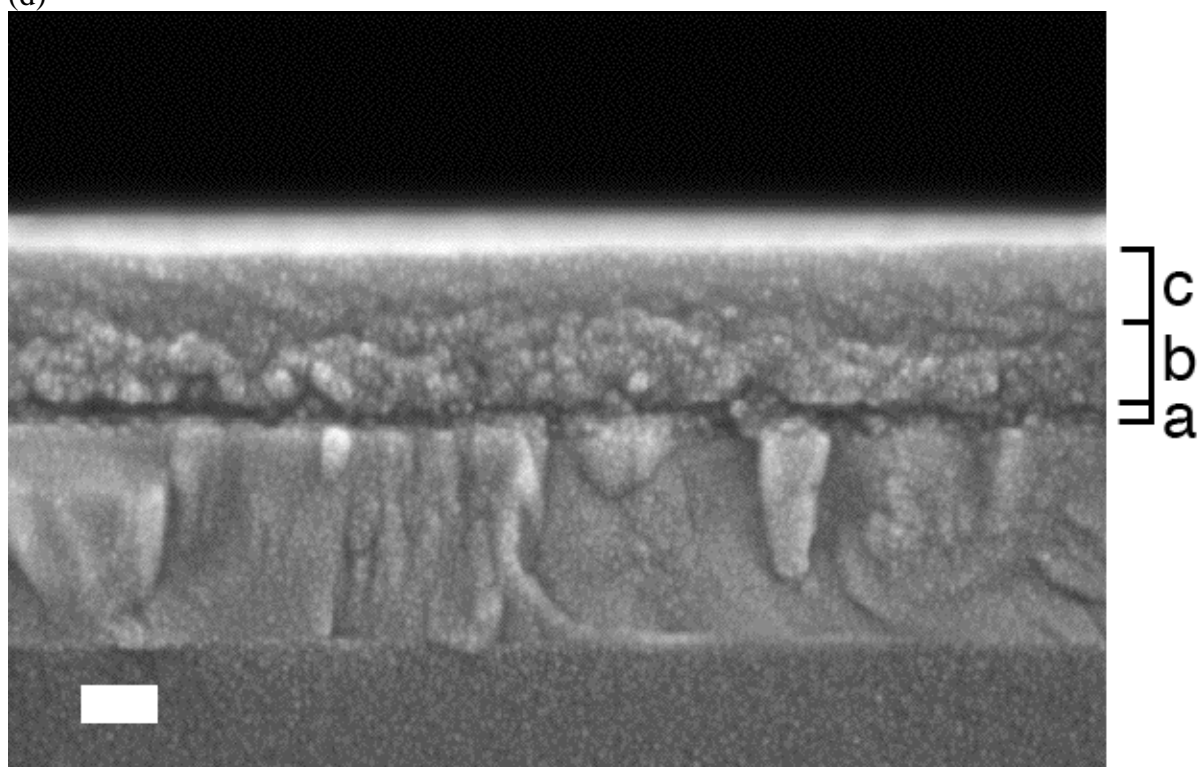

**Figure S4.** SEM cross section images of the active layers. Scale bar: 40 nm. (a) The P3HT:6 device. (b) The P3HT:7 device. (c) The P3HT:8 device. (d) The P3HT:PCBM device. Layers a, b, and c represent PEDOT:PSS, aggregates ascribed to P3HT, and rather homogenous substance ascribed to PCBM, respectively.
